# Supplementary material for: Vaccinations and childhood type 1 diabetes mellitus: a meta-analysis of observational studies
Source: PubMed Central journal article supplement (PMC4705121; doi:10.1007/s00125-015-3800-8), 2015-11-12

**ESM Figure 1:** Flow chart of search results

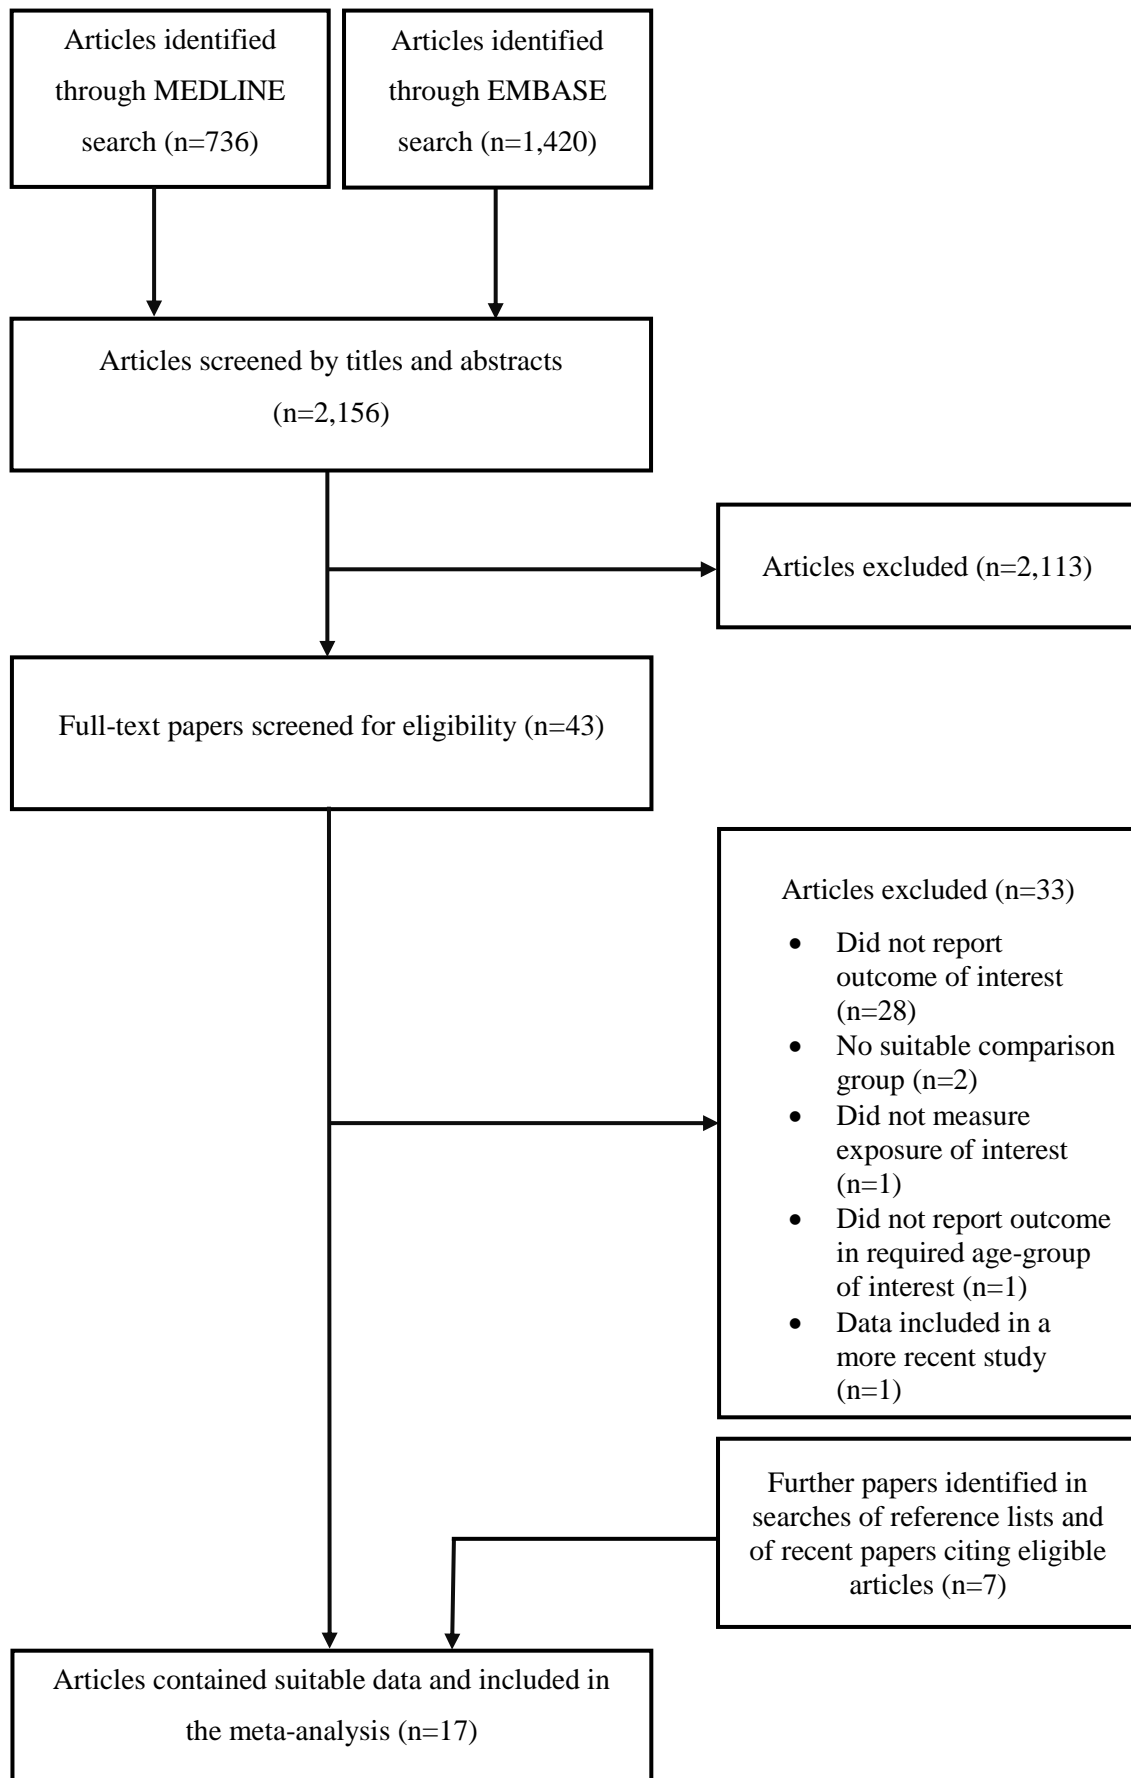

Supplement: 125_2015_3800_MOESM1_ESM.pdf [file 125_2015_3800_MOESM1_ESM.pdf]
