# Supplementary material for: Vaccinations and childhood type 1 diabetes mellitus: a meta-analysis of observational studies
Source: PubMed Central journal article supplement (PMC4705121; doi:10.1007/s00125-015-3800-8), 2015-11-12
Supplement: 125_2015_3800_MOESM2_ESM.pdf [file 125_2015_3800_MOESM2_ESM.pdf]

## Measles

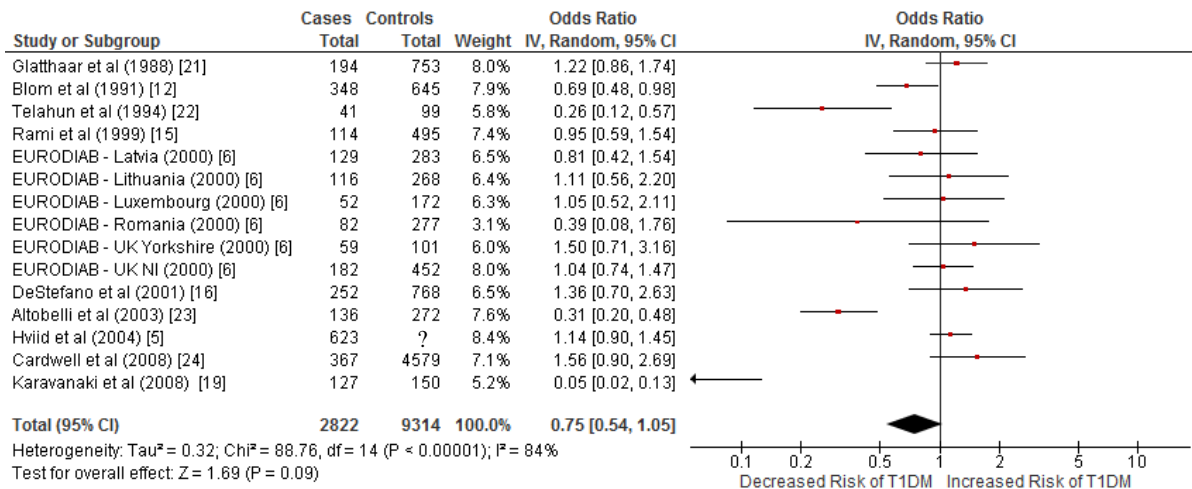

## Rubella

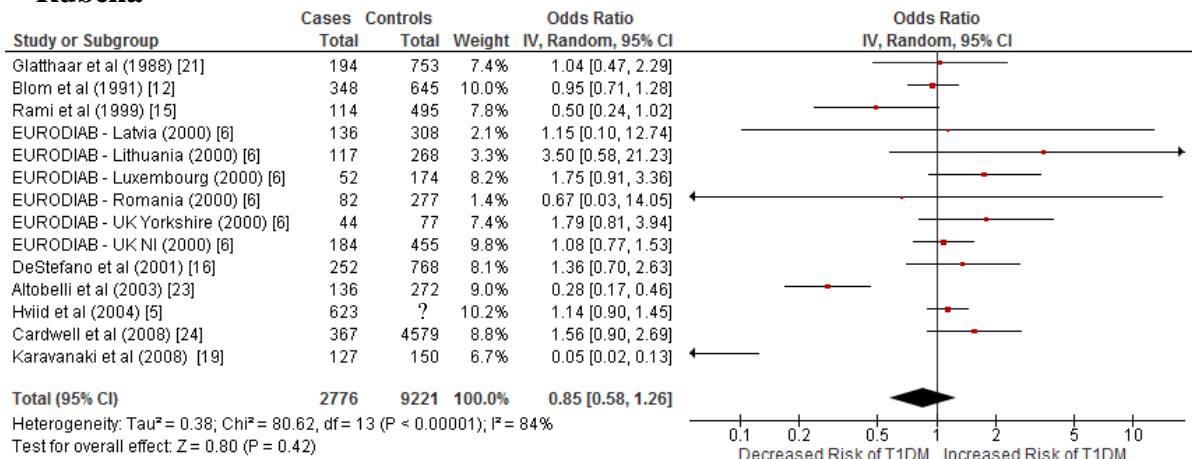

## Mumps

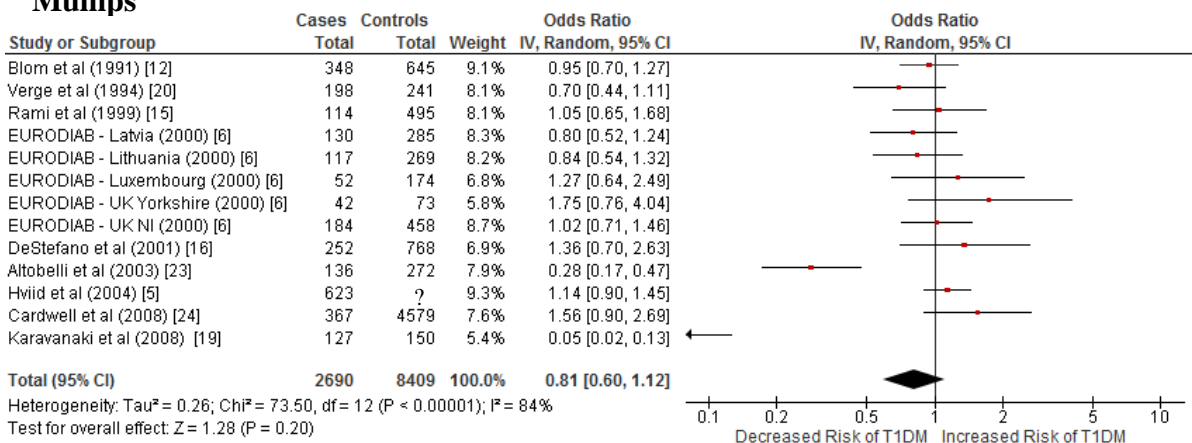

**ESM Figure 2:** Forest plot of vaccinations and type 1 diabetes using the random effects model based on inverse variance (IV) weighting, studies ordered by publication date using age-adjusted estimates where available. Chi<sup>2</sup>,  $\chi^2$ ; T1DM, Type 1 diabetes mellitus.

## Pertussis

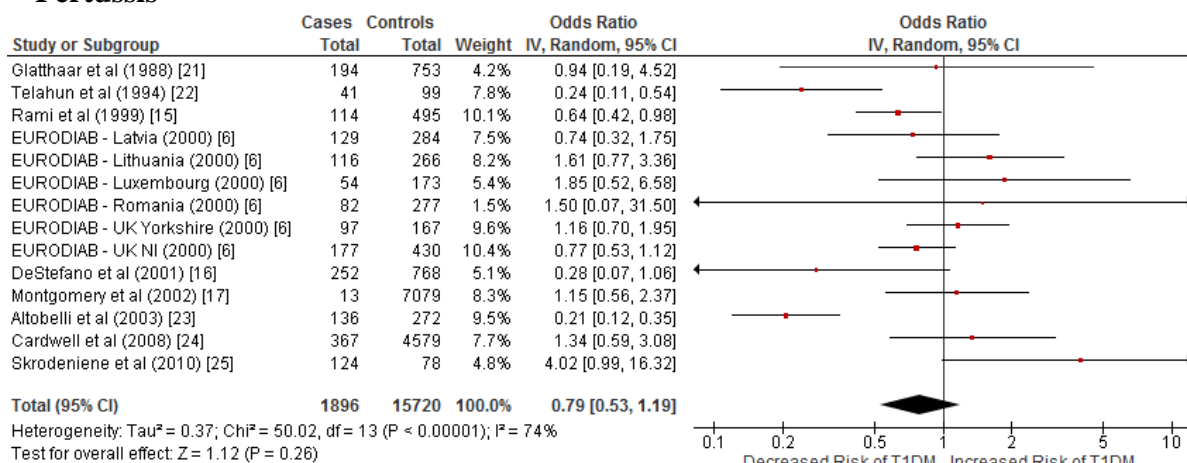

## BCG

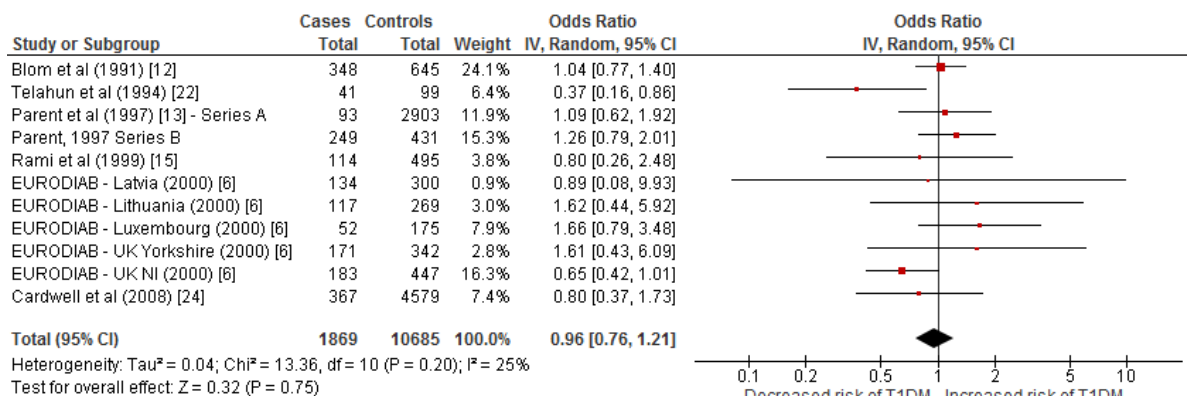

## HiB

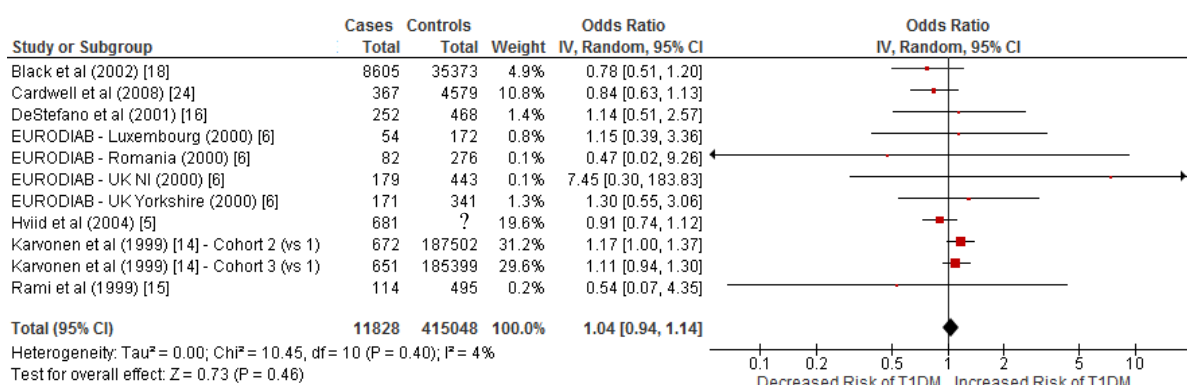

**ESM Figure 2 continued:** Forest plot of vaccinations and type 1 diabetes using the random effects model based on inverse variance (IV) weighting, studies ordered by publication date using age-adjusted estimates where available. Chi<sup>2</sup>,  $\chi^2$ ; T1DM, Type 1 diabetes mellitus.

## Poliomyelitis

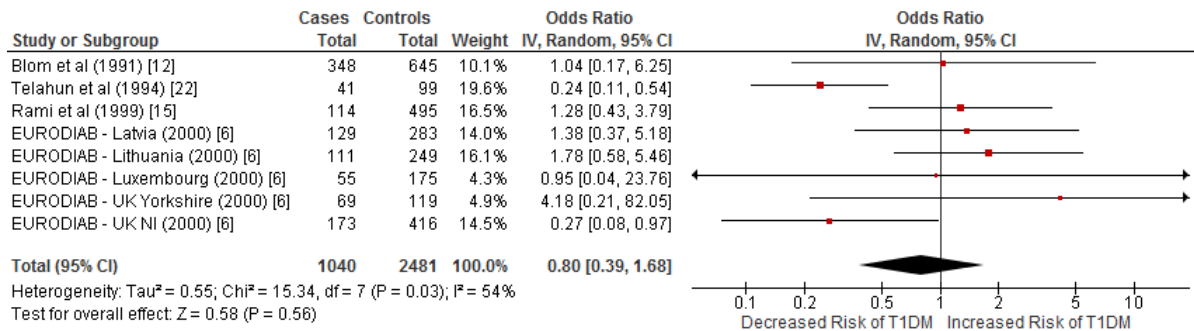

## Tetanus

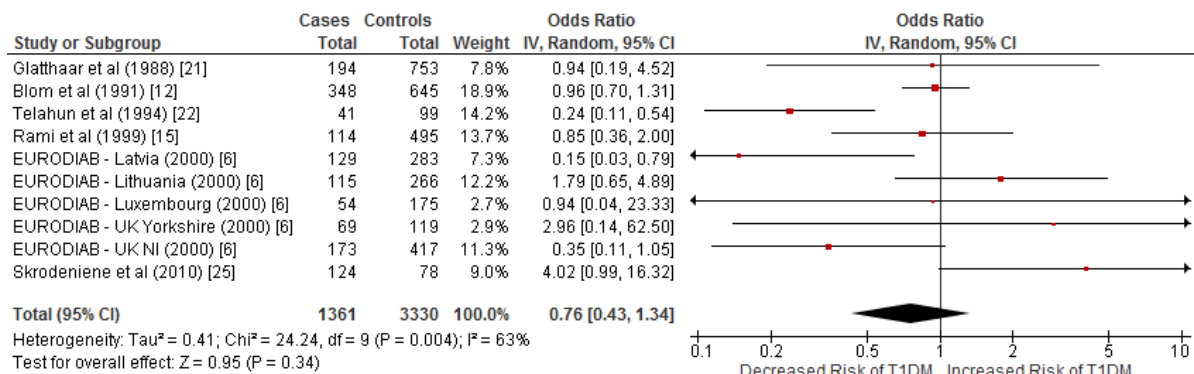

## Diphtheria

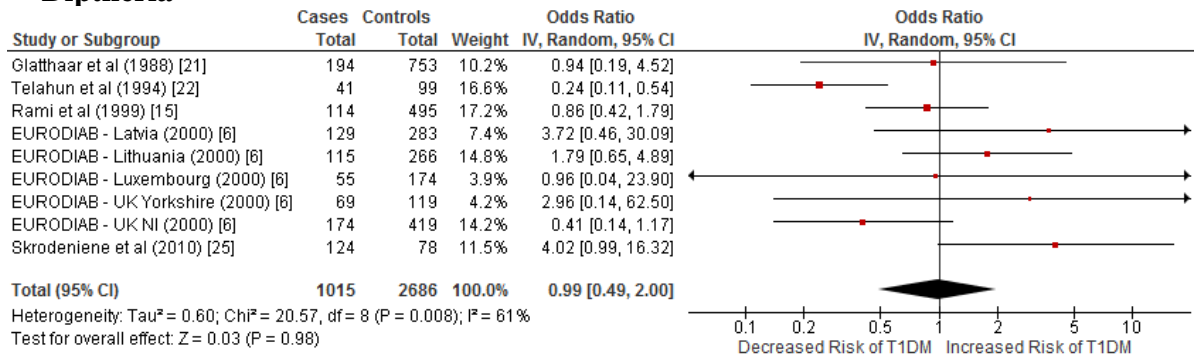

## MMR

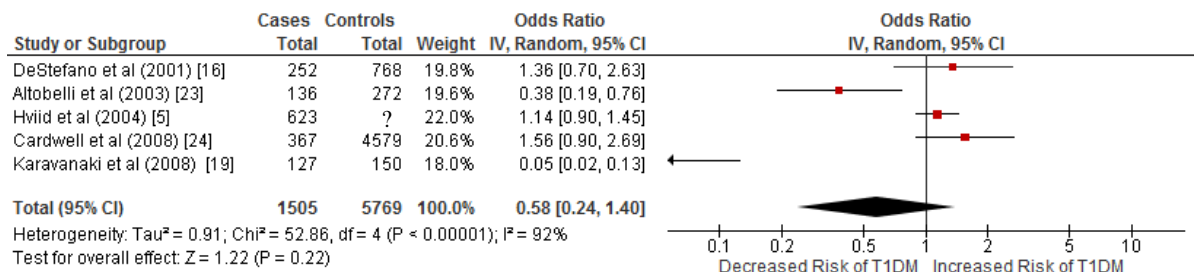

**ESM Figure 2 continued:** Forest plot of vaccinations and type 1 diabetes using the random effects model based on inverse variance (IV) weighting, studies ordered by publication date using age-adjusted estimates where available. Chi<sup>2</sup>,  $\chi^2$ ; T1DM, Type 1 diabetes mellitus.

## DTP

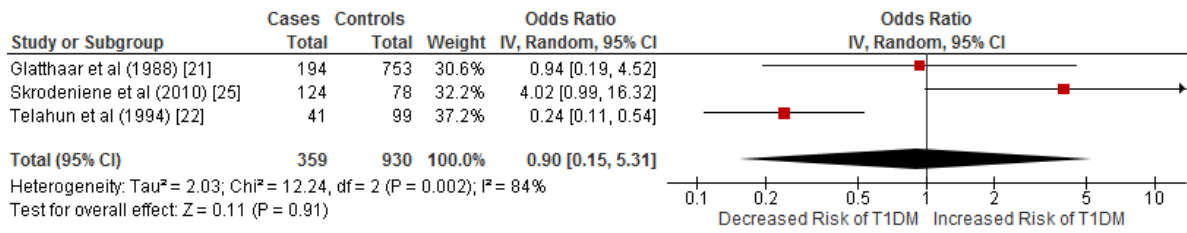

**ESM Figure 2** *continued*: Forest plot of vaccinations and type 1 diabetes using the random effects model based on inverse variance (IV) weighting, studies ordered by publication date using age-adjusted estimates where available. Chi<sup>2</sup>,  $\chi^2$ ; T1DM, Type 1 diabetes mellitus.
