# Supplementary material for: Vaccinations and childhood type 1 diabetes mellitus: a meta-analysis of observational studies
Source: PubMed Central journal article supplement (PMC4705121; doi:10.1007/s00125-015-3800-8), 2015-11-12
Supplement: 125_2015_3800_MOESM3_ESM.pdf [file 125_2015_3800_MOESM3_ESM.pdf]

ESM Table 1: Search strategy for used for identifying papers using MEDLINE.

| No. | Searches                                                                                                                                            |
|-----|-----------------------------------------------------------------------------------------------------------------------------------------------------|
| 1   | Diabetes Mellitus, Type 1/                                                                                                                          |
| 2   | IDDM.mp.                                                                                                                                            |
| 3   | diabetes.mp.                                                                                                                                        |
| 4   | Type 1.mp.                                                                                                                                          |
| 5   | 3 and 4                                                                                                                                             |
| 6   | 1 or 2 or 5                                                                                                                                         |
| 7   | Vaccination/                                                                                                                                        |
| 8   | vaccination.mp.                                                                                                                                     |
| 9   | Vaccines/ or vaccine.mp.                                                                                                                            |
| 10  | measles.mp. or Measles/ or Measles Vaccine/                                                                                                         |
| 11  | mumps.mp. or Mumps/ or Mumps Vaccine/                                                                                                               |
| 12  | Rubella/ or Rubella Vaccine/ or rubella.mp.                                                                                                         |
| 13  | Measles-Mumps-Rubella Vaccine/ or MMR.mp.                                                                                                           |
| 14  | Diphtheria/ or diphtheria.mp.                                                                                                                       |
| 15  | Diphtheria-Tetanus-Pertussis Vaccine/ or Diphtheria-Tetanus-acellular Pertussis Vaccines/ or Tetanus/ or tetanus.mp. or Diphtheria-Tetanus Vaccine/ |
| 16  | polio.mp. or Poliomyelitis/                                                                                                                         |
| 17  | whooping cough.mp. or Whooping Cough/                                                                                                               |
| 18  | Haemophilus influenzae type b/ or Haemophilus/ or Haemophilus Vaccines/ or haemophilus.mp.                                                          |
| 19  | morbilli.mp.                                                                                                                                        |
| 20  | parotitis.mp. or Parotitis/                                                                                                                         |
| 21  | german measles.mp.                                                                                                                                  |
| 22  | pertusis.mp. or Pertussis Vaccine/                                                                                                                  |
| 23  | pneumococcal.mp. or Pneumococcal Vaccines/                                                                                                          |
| 24  | BCG Vaccine/ or Bacillus-Calmette-Guerin.mp.                                                                                                        |
| 25  | BCG.mp.                                                                                                                                             |
| 26  | 7 or 8 or 9 or 10 or 11 or 12 or 13 or 14 or 15 or 16 or 17 or 18 or 19 or 20 or 21 or 22 or 23 or 24 or 25                                         |
| 27  | 6 and 26                                                                                                                                            |

IDDM, insulin dependent diabetes mellitus; mp, multi-purpose.
