# Supplementary material for: Vaccinations and childhood type 1 diabetes mellitus: a meta-analysis of observational studies
Source: PubMed Central journal article supplement (PMC4705121; doi:10.1007/s00125-015-3800-8), 2015-11-12
Supplement: 125_2015_3800_MOESM4_ESM.pdf [file 125_2015_3800_MOESM4_ESM.pdf]

ESM Table 2: List of 33 articles excluded from review after full-text screening.

|    | <b>Excluded papers</b>                                                                                                                                                                                                                  |
|----|-----------------------------------------------------------------------------------------------------------------------------------------------------------------------------------------------------------------------------------------|
| 1  | Sinaniotis CA, Daskalopoulou E, Lapatsanis P, Doxiadis S (1975) Letter: Diabetes mellitus after mumps vaccination. <i>Arch Dis Child</i> 50:749–750.                                                                                    |
| 2  | Dahlquist G, Blom L, Lönnberg G (1991) The Swedish Childhood Diabetes Study--a multivariate analysis of risk determinants for diabetes in different age groups. <i>Diabetologia</i> 34:757–762.                                         |
| 3  | Dahlquist G, Gothefors L (1995) The cumulative incidence of childhood diabetes mellitus in Sweden unaffected by BCG-vaccination. <i>Diabetologia</i> 38:873–874.                                                                        |
| 4  | Classen DC, Classen JB (1997) The timing of pediatric immunization and the risk of insulin-dependent diabetes mellitus. <i>Infect Dis Clin Pract</i> 6:449–454.                                                                         |
| 5  | Heijbel H, Chen RT, Dahlquist G (1997) Cumulative incidence of childhood-onset IDDM is unaffected by pertussis immunization. <i>Diabetes Care</i> 20:173–175.                                                                           |
| 6  | Jefferson T, Demicheli V (1998) No evidence that vaccines cause insulin dependent diabetes mellitus. <i>J Epidemiol Community Health</i> 52:674–675.                                                                                    |
| 7  | THE INSTITUTE FOR VACCINE SAFETY DIABETES WORKSHOP PANEL (1999) Childhood immunizations and type 1 diabetes: summary of an Institute for Vaccine Safety Workshop. <i>Pediatr Infect Dis J</i> 18:217–222.                               |
| 8  | Classen JB, Classen DC (1999) Association between type 1 diabetes and hib vaccine. Causal relation is likely. <i>BMJ</i> 319:1133.                                                                                                      |
| 9  | Elliman D (1999) Vaccination and type 1 diabetes mellitus. <i>BMJ</i> 318:1159–1160.                                                                                                                                                    |
| 10 | Classen JB, Classen DC (1999) Immunization in the First Month of Life may Explain Decline in Incidence of IDDM in the Netherlands. <i>Autoimmunity</i> 31:43–45.                                                                        |
| 11 | Classen JB, Classen DC (2000) Hemophilus vaccine associated with increased risk of diabetes: causality likely. <i>Diabetes care</i> , 23:872-873.                                                                                       |
| 12 | Galama JM (2000) Vaccinations as risk factors for Type I diabetes mellitus. <i>Diabetologia</i> 43:684.                                                                                                                                 |
| 13 | Milne LM (2000) Difficulties in assessing the relationship, if any, between mumps vaccination and diabetes mellitus in childhood. <i>Vaccine</i> 19:1018–1025.                                                                          |
| 14 | Hummel M, Füchtenbusch M, Schenker M, Ziegler AG (2000) No major association of breast-feeding, vaccinations, and childhood viral diseases with early islet autoimmunity in the German BABYDIAB Study. <i>Diabetes Care</i> 23:969–974. |
| 15 | Chen RT, Pless R, Destefano F (2001) Epidemiology of autoimmune reactions induced by vaccination. <i>J Autoimmun</i> 16:309–318.                                                                                                        |

ESM Table 2 *continued*: List of 33 articles excluded from review after full-text screening.

|    | <b>Excluded papers</b>                                                                                                                                                                                              |
|----|---------------------------------------------------------------------------------------------------------------------------------------------------------------------------------------------------------------------|
| 16 | Classen JB, Classen DC (2001) Vaccines and the risk of insulin-dependent diabetes (IDDM): potential mechanism of action. <i>Med Hypotheses</i> 57:532–538.                                                          |
| 17 | Robles DT, Eisenbarth GS (2001) Type 1A diabetes induced by infection and immunization. <i>J Autoimmun</i> 16:355–362.                                                                                              |
| 18 | Buschard K, Funda DP (2002) Vaccination studies in type 1 diabetes. <i>Lancet</i> 360:488; author reply 488.                                                                                                        |
| 19 | Soltész G (2003) Diabetes in the young: a paediatric and epidemiological perspective. <i>Diabetologia</i> 46:447–454.                                                                                               |
| 20 | Sipetic S, Vlajinac H, Kocev N, Radmanovic S (2003) The belgrade childhood diabetes study: association of infections and vaccinations on diabetes in childhood. <i>Ann Epidemiol</i> 13:645–651.                    |
| 21 | Wasfy JH (2004) Childhood vaccination and type 1 diabetes. <i>N Engl J Med</i> 351:298–300.                                                                                                                         |
| 22 | Rubinstein E (2004) Vaccination and autoimmune diseases: the argument against. <i>Isr Med Assoc J</i> 6:433–435.                                                                                                    |
| 23 | Tishler M, Shoenfeld Y (2004) Vaccination may be associated with autoimmune diseases. <i>Isr Med Assoc J</i> 6:430–432.                                                                                             |
| 24 | Classen JB (2004) Pertussis infections, vaccines and Type 1 diabetes. <i>Diabet Med</i> 21:397–398; author reply 398–399.                                                                                           |
| 25 | Demicheli V, Jefferson T, Rivetti A, Price D (2005) Vaccines for measles, mumps and rubella in children. <i>Cochrane database Syst Rev</i> 4.                                                                       |
| 26 | Huppmann M, Baumgarten A, Ziegler A-G, Bonifacio E (2005) Neonatal Bacille Calmette-Guerin Vaccination and Type 1 Diabetes. <i>Diabetes Care</i> 28:1204–1206.                                                      |
| 27 | Sipetić SB, Vlajinac HD, Kocev NI, et al. (2005) The Belgrade childhood diabetes study: a multivariate analysis of risk determinants for diabetes. <i>Eur J Public Health</i> 15:117–122.                           |
| 28 | Rousseau M-C, Parent M-E, St-Pierre Y (2008) Potential health effects from non-specific stimulation of the immune function in early age: The example of BCG vaccination. <i>Pediatr Allergy Immunol</i> 19:438–448. |
| 29 | Silfverdal S-A, Nilsson L, Blennow M, et al. (2010) Vaccination of children - summary and conclusions from a systematic review. <i>Acta Paediatr</i> 99:1287–1289.                                                  |

ESM Table 2 *continued*: List of 33 articles excluded from review after full-text screening.

|    | <b>Excluded papers</b>                                                                                                                                                                                                                            |
|----|---------------------------------------------------------------------------------------------------------------------------------------------------------------------------------------------------------------------------------------------------|
| 30 | Rasmussen TA, Jørgensen MRS, Bjerrum S, et al. (2012) Use of population based background rates of disease to assess vaccine safety in childhood and mass immunisation in Denmark: nationwide population based cohort study. <i>BMJ</i> 345:e5823. |
| 31 | Duderstadt SK, Rose CE, Real TM, et al. (2012) Vaccination and risk of type 1 diabetes mellitus in active component U.S. Military, 2002-2008. <i>Vaccine</i> 30:813–819.                                                                          |
| 32 | Ovetchkine P Effets secondaires des vaccinations. <i>Arch pédiatrie</i> 8:316–320.                                                                                                                                                                |
| 33 | Vial T, Descotes J Autoimmune diseases and vaccinations. <i>Eur J Dermatol</i> 14:86–90.                                                                                                                                                          |
