# Supplementary material for: Vaccinations and childhood type 1 diabetes mellitus: a meta-analysis of observational studies
Source: PubMed Central journal article supplement (PMC4705121; doi:10.1007/s00125-015-3800-8), 2015-11-12
Supplement: 125_2015_3800_MOESM5_ESM.pdf [file 125_2015_3800_MOESM5_ESM.pdf]

ESM Table 3: Vaccinations reported by studies, ordered by year of publication

| First author, year [reference]   | Measles | Rubella | Mumps | Pertussis | BCG | HiB | Tetanus | Diphtheria | Poliomyelitis | MMR            | DTP            | H1N1 | Tick-borne encephalitis | Hepatitis B | Meningitis C | Smallpox |
|----------------------------------|---------|---------|-------|-----------|-----|-----|---------|------------|---------------|----------------|----------------|------|-------------------------|-------------|--------------|----------|
| Glatthaar, 1988 [21]             | ✓       | ✓       | -     | ✓         | -   | -   | ✓       | ✓          | -             | -              | ✓ <sup>c</sup> | -    | -                       | -           | -            | -        |
| Blom, 1991 [12]                  | ✓       | ✓       | ✓     | -         | ✓   | -   | ✓       | -          | ✓             | -              | -              | -    | -                       | -           | -            | ✓        |
| Telahun, 1994 [22]               | ✓       | -       | -     | ✓         | ✓   | -   | ✓       | ✓          | ✓             | -              | ✓ <sup>c</sup> | -    | -                       | -           | -            | -        |
| Verge, 1994 [20]                 | -       | -       | ✓     | -         | -   | -   | -       | -          | -             | -              | -              | -    | -                       | -           | -            | -        |
| Parent, 1997 <sup>a</sup> [13]   |         |         |       |           |     |     |         |            |               |                |                |      |                         |             |              |          |
| Series A                         | -       | -       | -     | -         | ✓   | -   | -       | -          | -             | -              | -              | -    | -                       | -           | -            | -        |
| Series B                         | -       | -       | -     | -         | ✓   | -   | -       | -          | -             | -              | -              | -    | -                       | -           | -            | -        |
| Karvonen, 1999 <sup>b</sup> [14] |         |         |       |           |     |     |         |            |               |                |                |      |                         |             |              |          |
| Cohort 2                         | -       | -       | -     | -         | -   | ✓   | -       | -          | -             | -              | -              | -    | -                       | -           | -            | -        |
| Cohort 3                         | -       | -       | -     | -         | -   | ✓   | -       | -          | -             | -              | -              | -    | -                       | -           | -            | -        |
| Rami, 1999 [15]                  | ✓       | ✓       | ✓     | ✓         | ✓   | ✓   | ✓       | ✓          | ✓             | -              | -              | -    | ✓                       | -           | -            | -        |
| EURODIAB Latvia, 2000 [6]        | ✓       | ✓       | ✓     | ✓         | ✓   | -   | ✓       | ✓          | ✓             | -              | -              | -    | -                       | -           | -            | -        |
| EURODIAB Lithuania, 2000 [6]     | ✓       | ✓       | ✓     | ✓         | ✓   | -   | ✓       | ✓          | ✓             | -              | -              | -    | -                       | -           | -            | -        |
| EURODIAB Luxembourg, 2000 [6]    | ✓       | ✓       | ✓     | ✓         | ✓   | ✓   | ✓       | ✓          | ✓             | -              | -              | -    | -                       | -           | -            | -        |
| EURODIAB Romania, 2000 [6]       | ✓       | ✓       | -     | ✓         | -   | ✓   | -       | -          | -             | -              | -              | -    | -                       | -           | -            | -        |
| EURODIAB UK Yorkshire, 2000 [6]  | ✓       | ✓       | ✓     | ✓         | ✓   | ✓   | ✓       | ✓          | ✓             | -              | -              | -    | -                       | -           | -            | -        |
| EURODIAB UK NI, 2000 [6]         | ✓       | ✓       | ✓     | ✓         | ✓   | ✓   | ✓       | ✓          | ✓             | -              | -              | -    | -                       | -           | -            | -        |
| DeStefano, 2001 [16]             | ✓       | ✓       | ✓     | ✓         | -   | ✓   | -       | -          | -             | ✓ <sup>c</sup> | -              | -    | -                       | ✓           | -            | -        |
| Black, 2002 [18]                 | -       | -       | -     | -         | -   | ✓   | -       | -          | -             | -              | -              | -    | -                       | -           | -            | -        |
| Montgomery, 2002 [17]            | -       | -       | -     | ✓         | -   | -   | -       | -          | -             | -              | -              | -    | -                       | -           | -            | -        |
| Altobelli, 2003 [23]             | ✓       | ✓       | ✓     | ✓         | -   | -   | -       | -          | -             | ✓ <sup>c</sup> | -              | -    | -                       | -           | -            | -        |
| Hviid, 2004 [5]                  | ✓       | ✓       | ✓     | -         | -   | ✓   | -       | -          | -             | ✓ <sup>c</sup> | -              | -    | -                       | -           | -            | -        |
| Cardwell, 2008 [24]              | ✓       | ✓       | ✓     | ✓         | ✓   | ✓   | -       | -          | -             | ✓ <sup>c</sup> | -              | -    | -                       | -           | ✓            | -        |
| Karavanaki, 2008 [19]            | ✓       | ✓       | ✓     | -         | -   | -   | -       | -          | -             | ✓ <sup>c</sup> | -              | -    | -                       | -           | -            | -        |
| Skrodeniene, 2010 [25]           | -       | -       | -     | -         | -   | -   | ✓       | ✓          | ✓             | -              | ✓ <sup>c</sup> | -    | -                       | -           | -            | -        |
| Bardage, 2011 [26]               | -       | -       | -     | -         | -   | -   | -       | -          | -             | -              | -              | ✓    | -                       | -           | -            | -        |

BCG, Bacillus Calmette–Guérin; HiB, haemophilus influenza B; MMR, mumps, measles, rubella; NI, Northern Ireland. <sup>a</sup>Estimates for two case-control series were provided by this article.

<sup>b</sup>Estimates were provided in two different exposed groups compared to the same unexposed group. <sup>c</sup>These estimates were used both for combined vaccine and single vaccines.
